# Supplementary material for: Reliable organic memristors for neuromorphic computing by predefining a localized ion-migration path in crosslinkable polymer
Source: Royal Society of Chemistry journal article supplement (doi:10.1039/d0nr06964g), 2020-01-01
Supplement: d0nr06964g1.pdf [file d0nr06964g1.pdf]

Electronic Supplementary Information (ESI) for

# Reliable Organic Memristors for Neuromorphic Computing by Predefining a Localized Ion-Migration Path in Crosslinkable Polymer

*Hea-Lim Park<sup>a</sup>, Min-Hwi Kim<sup>b</sup>, Min-Hoi Kim<sup>c\*</sup>, and Sin-Hyung Lee<sup>d\*</sup>*

<sup>a</sup>Department of Materials Science and Engineering, Gwanak-ku, Seoul National University,  
Seoul 151-600, Republic of Korea

<sup>b</sup>School of Electrical and Computer Engineering, Gwanak-ku, Seoul National University, Seoul  
151-600, Republic of Korea

<sup>c</sup>Department of Creative Convergence Engineering, Hanbat National University, Yuseong-ku,  
Daejeon 305-719, Republic of Korea

<sup>d</sup>School of Electronics Engineering, and School of Electronic and Electrical Engineering,  
Kyungpook National University, Bukgu, Daegu 702-701, Republic of Korea

Corresponding Author

\*E-mail: [mhkim8@hanbat.ac.kr](mailto:mhkim8@hanbat.ac.kr) (M.-H. Kim), [sinhlee@knu.ac.kr](mailto:sinhlee@knu.ac.kr) (S.-H. Lee)

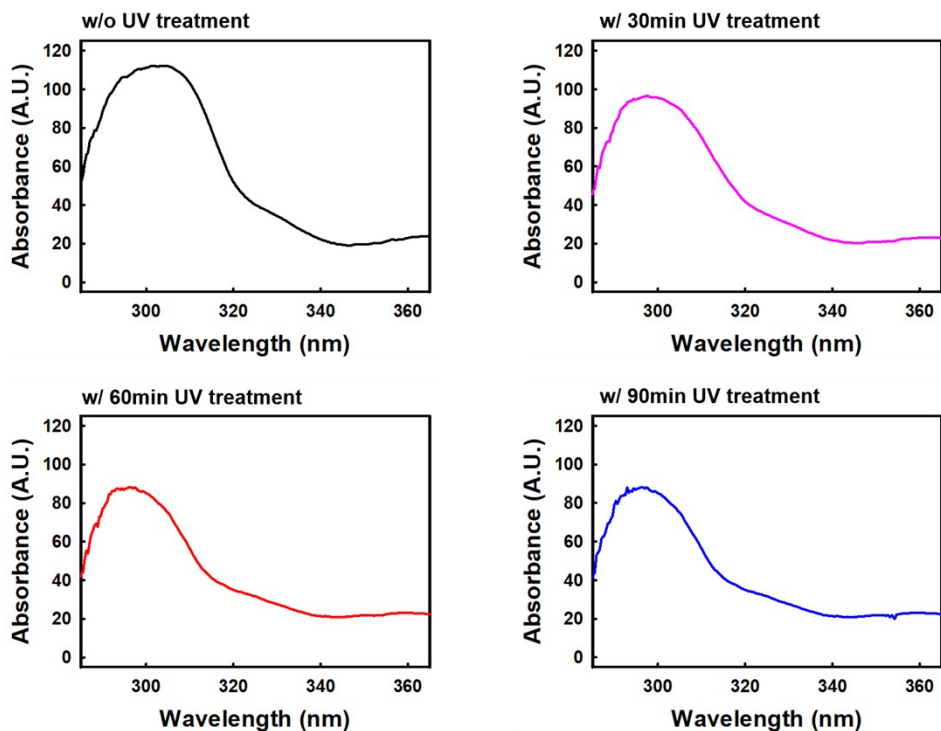

Fig. S1 UV-vis absorption spectra of PVCi films according to the UV treatment time.

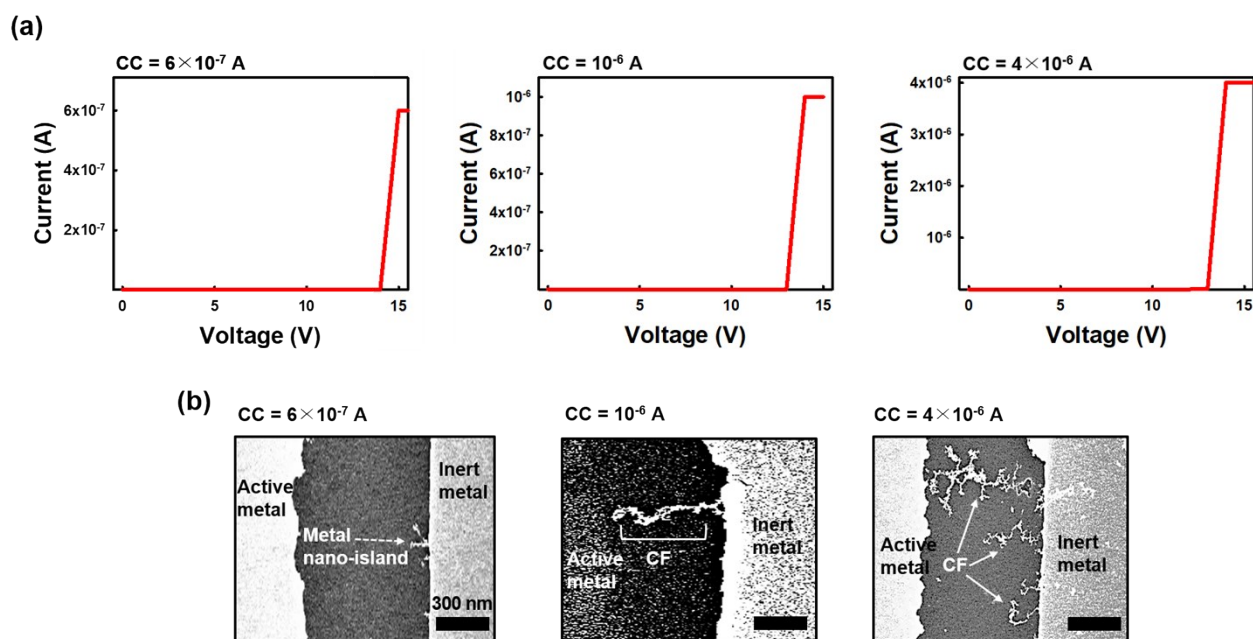

Fig. S2 Conductive filament formation in Device 1 with various compliance currents of the writing process. (a) Three types of electroforming processes with different compliance current values of  $6 \times 10^{-7}$  A (the left panel),  $10^{-6}$  A (the middle panel), and  $4 \times 10^{-6}$  A (the right panel). (b) Field emission scanning electron microscopy images of the devices after the forming processes.

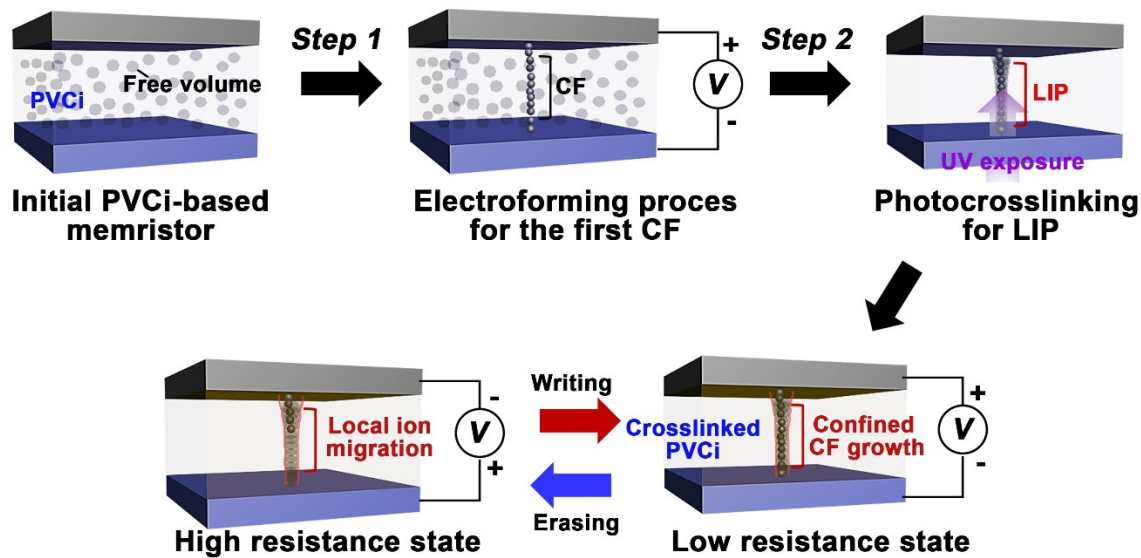

**Fig. S3** Conceptual schematic diagram depicting the steps for defining the local ion-migration path (LIP) in the proposed organic memristor.

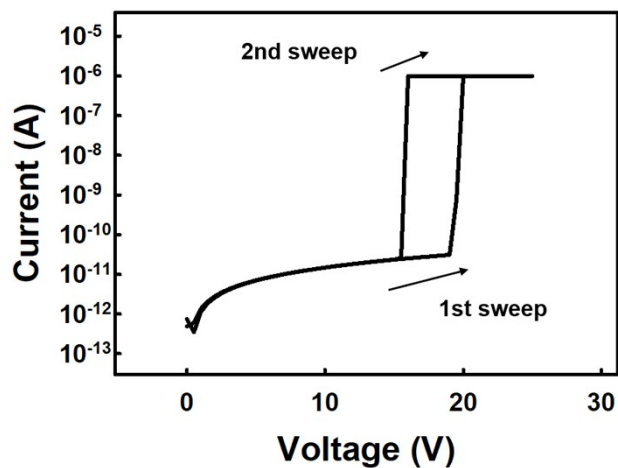

**Fig. S4** Current-voltage curves of the vertical-type device consisting of the crosslinked polymer medium (PVCi).

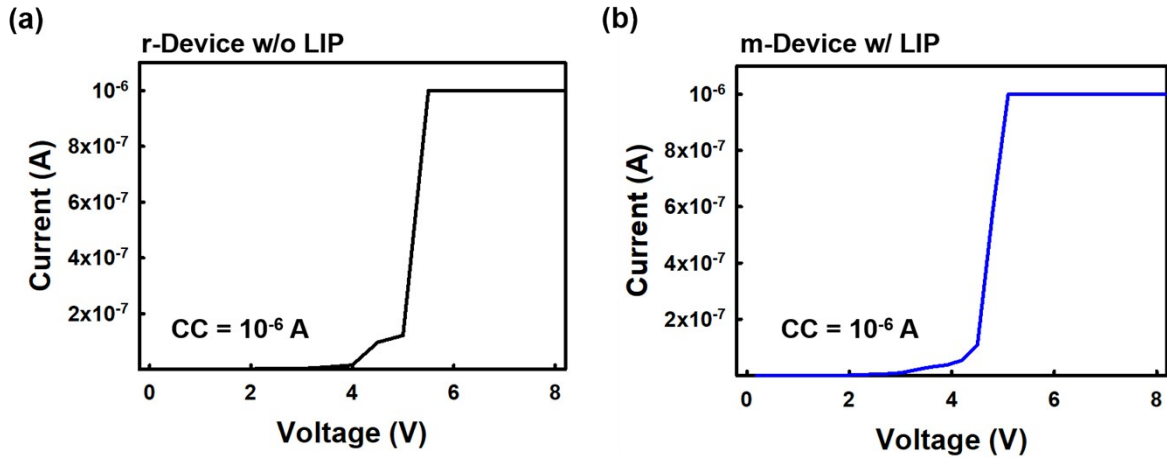

**Fig. S5** Electroforming processes for triggering (a) r-Device and (b) m-Device. The forming voltages of Device 1 and Device 2 are about 5.5 V and 5.0 V, respectively.

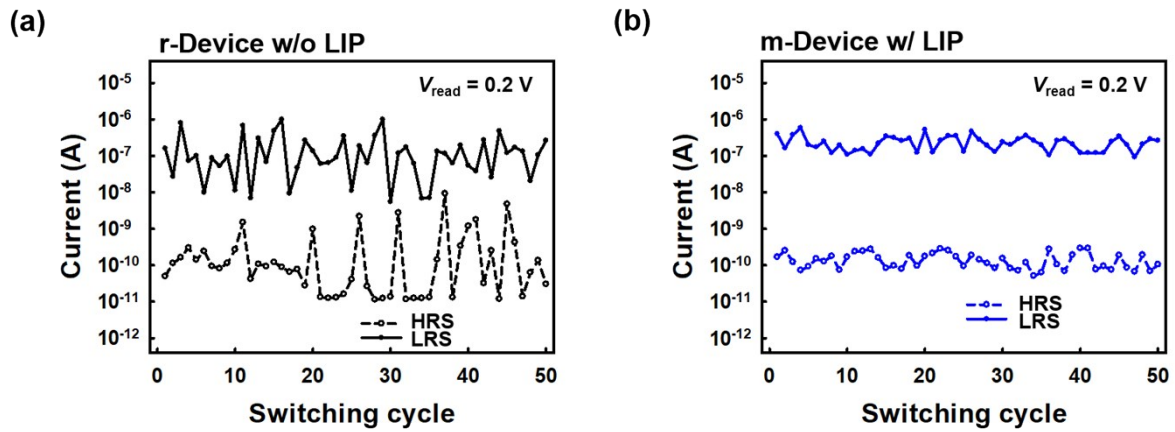

**Fig. S6** Current variations in (a) r-Device and (b) m-Device at  $V_{\text{read}} = 0.2$  V after the repeated 50 cycles of the writing and erasing processes.

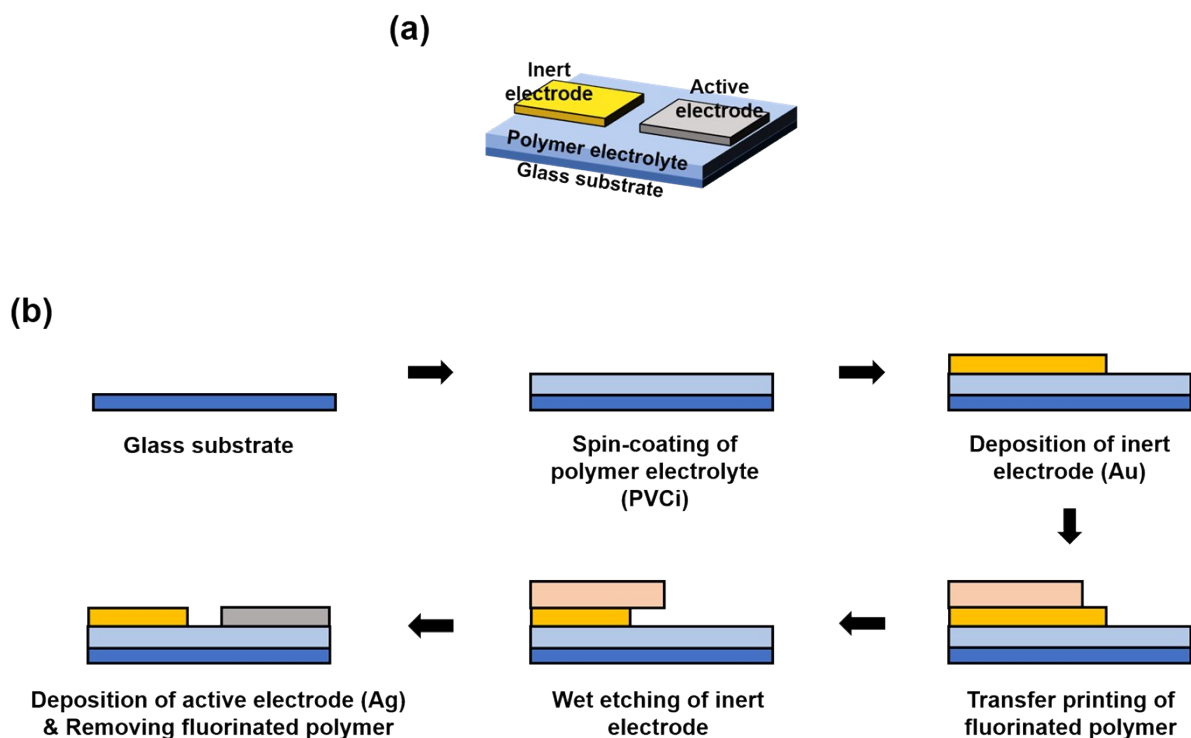

**Fig. S7** (a) A schematic of the lateral-type organic memristor. (b) Fabricating steps for the lateral-type organic memristors (r-Device and m-Device). In the case of m-Device, the photo-crosslinking process was performed after the electroforming process to define the LIP.

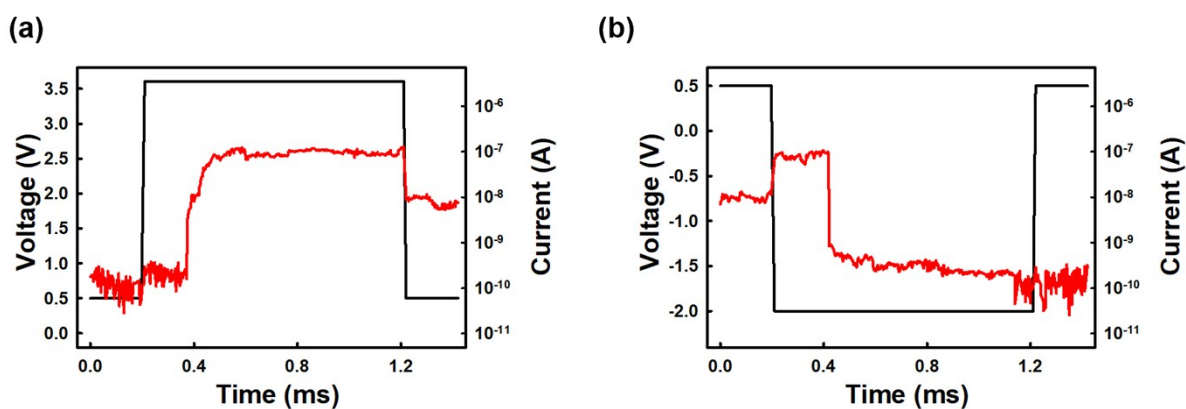

**Fig. S8** Transient responses of m-Device to the switching voltage pulses. (a) Voltage pulse with the amplitude of 3.6 V was utilized for writing and (b) the pulse with the amplitude -2.0 V was utilized for erasing. The switching times for writing and erasing were about 300  $\mu$ s and 300  $\mu$ s, respectively.

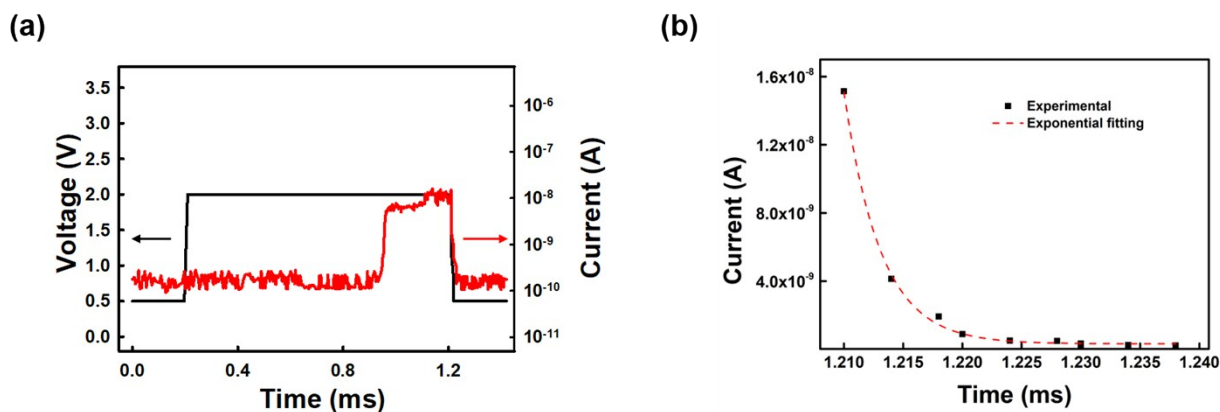

**Fig. S9** Short-term plasticity in m-Device. (a) Under the voltage pulse with the amplitude of 2.0 V, the device showed the volatile-memory characteristics. (b) The relaxation of the device in current level. The experimental data is fitted by an exponential decay function.

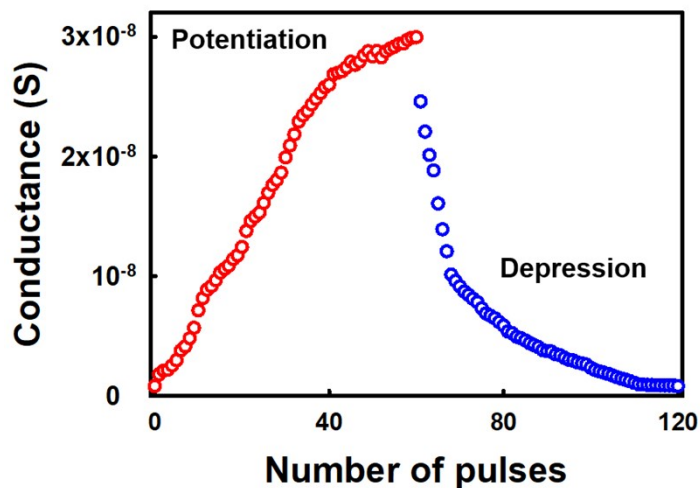

**Fig. S10** Multi-level memory characteristics of m-Device. The voltage-pulse amplitudes for potentiation and depression were 4.8 V and -2.7 V, respectively. The time width of each pulse was 100  $\mu$ s long.

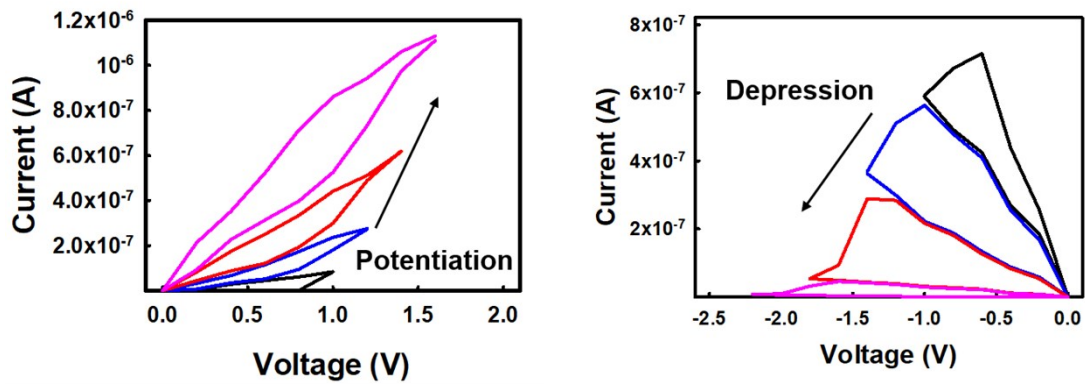

**Fig. S11** The nonlinear transmission characteristics of m-Device. The conductance of the device was effectively modulated by the dual-voltage sweeps.

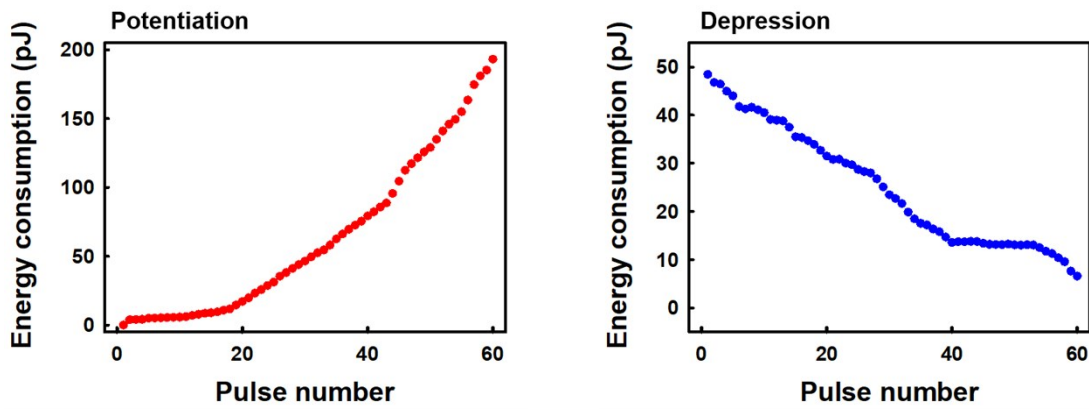

**Fig. S12** Energy consumption of m-Device in each pulse for the potentiation and depression processes illustrated in Fig. 6d.
